# Supplementary material for: HPV vaccine initiation at 9 or 10 years of age and better series completion by age 13 among privately and publicly insured children in the US
Source: PubMed Central journal article supplement — Hum Vaccin Immunother. 2023 Jan 11;19(1):2161253. doi: 10.1080/21645515.2022.2161253 (PMC9980633; doi:10.1080/21645515.2022.2161253), 2023-01-11
Supplement: KHVI_A_2161253_SM0150.pdf [file KHVI_A_2161253_SM0150.pdf]

## SUPPLEMENTARY MATERIALS

**Table S1.** Recommended 9vHPV vaccine schedules.

| Description | 9vHPV                                       |                                                                 |
|-------------|---------------------------------------------|-----------------------------------------------------------------|
| HPV strains | 6, 11, 16, 18, 31, 33, 45, 52, 58           |                                                                 |
| Regimen     | 2 doses for individuals 9–14 years of age * | 3 doses for individuals ≥15 years of age or immunocompromised * |
| Schedule    |                                             |                                                                 |
| Dose 1      | 0 months                                    | 0 months                                                        |
| Dose 2      | 6–12 months                                 | 1–2 months                                                      |
| Dose 3      | NA                                          | 6 months                                                        |

HPV, human papilloma virus; NA, not applicable.

\* If a second dose is administered to an individual 9–14 years of age earlier than 5 months after the first dose, it is recommended to administer a third dose at least 5 months after the first dose and a minimum of 12 weeks after the second dose. The 3-dose schedule is also recommended for individuals 15–26 years of age (with the second dose 2 months after the first) and for individuals 9–26 years of age who are immunocompromised (with the second dose 1–2 months after the first).<sup>3, 58</sup>

**Table S2.** International Statistical Classification of Diseases codes used to identify immunocompromised status.

| ICD-9 codes                                                                                                                                                                                      | ICD-10 codes                                                             |
|--------------------------------------------------------------------------------------------------------------------------------------------------------------------------------------------------|--------------------------------------------------------------------------|
| 042                                                                                                                                                                                              | B20–B24                                                                  |
| 135                                                                                                                                                                                              | B59                                                                      |
| 136.3                                                                                                                                                                                            | C00–C07, C11–C19, C22–C80, Z85                                           |
| 140–199                                                                                                                                                                                          | C7A, C7B, D3A                                                            |
| 199.2                                                                                                                                                                                            | C80.2                                                                    |
| 200–208                                                                                                                                                                                          | C81–C83, C88–C96                                                         |
| 235–239                                                                                                                                                                                          | D00–D49                                                                  |
| 260–262                                                                                                                                                                                          | D61.09, D61.810, D61.811, D61.818                                        |
| 277.3, 277.31, 277.39                                                                                                                                                                            | D70, D70.0, D70.1, D70.2, D70.4, D70.8, D70.9                            |
| 279.00, 279, 279.01, 279.02, 279.03, 279.04,<br>279.05, 279.06, 279.09, 279.10, 279.11, 279.12,<br>279.13, 279.19, 279.2, 279.3, 279.41, 279.49,<br>279.50, 279.51, 279.52, 279.53, 279.8, 279.9 | D71                                                                      |
| 284.09, 284.11, 284.12, 284.19                                                                                                                                                                   | D72.0, D72.81, D72.810, D72.818, D72.819,<br>D72.89, D72.9               |
| 288.00, 288, 288.01, 288.02, 288.03, 288.09,<br>288.1, 288.2, 288.4, 288.50, 288.5, 288.51,<br>288.59, 288.8, 288.9                                                                              | D73.81                                                                   |
| 289.53, 289.83, 289.89, 289.9                                                                                                                                                                    | D75.81, D75.89, D75.9                                                    |
| 340–341                                                                                                                                                                                          | D76.1, D76.2, D76.3                                                      |
| 357                                                                                                                                                                                              | D80.0, D80.1, D80.2, D80.3, D80.4, D80.5,<br>D80.6, D80.7, D80.8, D80.9  |
| 403.01, 403.11, 403.91                                                                                                                                                                           | D81.0, D81.1, D81.2, D81.4, D81.6, D81.7,<br>D81.89, D81.9               |
| 404.02, 404.03, 404.12, 404.13, 404.92, 404.93                                                                                                                                                   | D82.0, D82.1, D82.2, D82.3, D82.4, D82.8,<br>D82.9                       |
| 422                                                                                                                                                                                              | D83.0, D83.1, D83.2, D83.8, D83.9                                        |
| 446                                                                                                                                                                                              | D84.0, D84.1, D84.8, D84.9                                               |
| 495.9                                                                                                                                                                                            | D86                                                                      |
| 516                                                                                                                                                                                              | D89, D89.3, D89.810, D89.811, D89.812,<br>D89.813, D89.82, D89.89, D89.9 |
| 555–558                                                                                                                                                                                          | E40–E43                                                                  |
| 579.3                                                                                                                                                                                            | E85, E85.0; M04, E85.1, E85.3, E85.8                                     |
| 585.5, 585.6                                                                                                                                                                                     | G35–G36                                                                  |
| 695.4                                                                                                                                                                                            | G37.1, G37.3, G37.8, G37.9                                               |
| 710–714                                                                                                                                                                                          | G61.0, G61.9                                                             |
| 720                                                                                                                                                                                              | I12.0                                                                    |
| 725                                                                                                                                                                                              | I13.11, I13.2                                                            |
| 795.7, 795.79                                                                                                                                                                                    | I40                                                                      |
| 996.80, 996.8, 996.81, 996.82, 996.83, 996.84,<br>996.85, 996.86, 996.87, 996.88, 996.89                                                                                                         | J84.01, J84.02, J84.09                                                   |
| V08                                                                                                                                                                                              | K50–K52                                                                  |
| V42, V42.0, V42.1, V42.6, V42.7, V42.81,<br>V42.82, V42.83, V42.84, V42.89                                                                                                                       | K91.2                                                                    |
| V45.11                                                                                                                                                                                           | L93.0, L93.2, M32                                                        |
| V56.0, V56.1, V56.2                                                                                                                                                                              | L94, M35.8, M35.9<br>M01.X0, M02.10<br>M05–M14<br>M30                    |

M31.5, M35.3  
M35.9  
M46  
N18.5, N18.6  
R76, R83.4–R87.4, R89.4  
T78.40, J67.9  
T86, T86.00, T86.01, T86.02, T86.03, T86.09,  
T86.10, T86.11, T86.12, T86.13, T86.19, T86.20,  
T86.21, T86.22, T86.23, T86.290, T86.298,  
T86.30, T86.31, T86.32, T86.33, T86.39, T86.40,  
T86.41, T86.42, T86.43, T86.49, T86.5, T86.810,  
T86.811, T86.812, T86.818, T86.819, T86.830,  
T86.831, T86.832, T86.838, T86.839, T86.850,  
T86.851, T86.852, T86.858, T86.859, T86.890,  
T86.891, T86.892, T86.898, T86.899, T86.90,  
T86.91, T86.92, T86.93, T86.99  
Z21  
Z48.21, Z48.22, Z48.23, Z48.24, Z48.280,  
Z48.290, Z48.298  
Z49.01, Z49.02, Z49.31  
Z94.0, Z94.1, Z94.2, Z94.3, Z94.4, Z94.81,  
Z94.82, Z94.83, Z94.84, Z94.89, Z94, Z98.85  
Z99.2

---

ICD, International Statistical Classification of Diseases.

**Table S3.** Proportion of proactive and routine vaccine initiators among all individuals potentially eligible to initiate an HPV vaccination series.

| Initiator group | Privately insured database          |                                                |                                 | Publicly insured database           |                                                |                                 |
|-----------------|-------------------------------------|------------------------------------------------|---------------------------------|-------------------------------------|------------------------------------------------|---------------------------------|
|                 | Initiators<br>( <i>N</i> = 100,117) | Eligible Recipients<br>( <i>N</i> = 1,881,857) | Percentage<br>initiating series | Initiators<br>( <i>N</i> = 115,863) | Eligible Recipients<br>( <i>N</i> = 1,933,636) | Percentage<br>initiating series |
| Proactive       | 1,976                               | 907,235                                        | 0.22                            | 7,586                               | 980,171                                        | 0.77                            |
| Routine         | 98,141                              | 974,622                                        | 10.07                           | 108,277                             | 953,465                                        | 11.36                           |

Proactive initiators were 9–10 years of age and routine initiators were 11–12 years of age at their index date.

**Table S4.** Demographic and clinical characteristics for sensitivity analysis study populations <sup>A</sup>.

|                               | Privately insured database |               |                        |               | Publicly insured database |               |                        |               |
|-------------------------------|----------------------------|---------------|------------------------|---------------|---------------------------|---------------|------------------------|---------------|
|                               | Sensitivity analysis 1     |               | Sensitivity analysis 2 |               | Sensitivity analysis 1    |               | Sensitivity analysis 2 |               |
|                               | (N = 94,012)               |               | (N = 93,463)           |               | (N = 105,584)             |               | (N = 103,012)          |               |
|                               | Proactive                  | Routine       | Proactive              | Routine       | Proactive                 | Routine       | Proactive              | Routine       |
|                               | initiators                 | initiators    | initiators             | initiators    | initiators                | initiators    | initiators             | initiators    |
|                               | (N = 867)                  | (N = 93,145)  | (N = 318)              | (N = 93,145)  | (N = 4,418)               | (N = 101,436) | (N = 1,576)            | (N = 101,436) |
| Gender                        |                            |               |                        |               |                           |               |                        |               |
| Female                        | 459 (52.9)                 | 47,801 (51.3) | 185 (58.2)             | 47,801 (51.3) | 2,062 (49.7)              | 51,061 (50.3) | 780 (49.5)             | 51,061 (50.3) |
| Male                          | 408 (47.1)                 | 45,344 (48.7) | 133 (41.8)             | 45,344 (48.7) | 2,086 (50.3)              | 50,375 (49.7) | 796 (50.5)             | 50,375 (49.7) |
| Race / ethnicity <sup>B</sup> |                            |               |                        |               |                           |               |                        |               |
| Non-Hispanic White            | -                          | -             | -                      | -             | 1,348 (32.5)              | 43,424 (42.8) | 518 (32.9)             | 43,424 (42.8) |
| Non-Hispanic Black            | -                          | -             | -                      | -             | 1,572 (37.9)              | 35,882 (35.4) | 611 (38.8)             | 35,882 (35.4) |
| Hispanic                      | -                          | -             | -                      | -             | 768 (18.5)                | 12,481 (12.3) | 296 (18.8)             | 12,481 (12.3) |
| Other                         | -                          | -             | -                      | -             | 460 (11.1)                | 9,649 (9.5)   | 151 (9.6)              | 9,649 (9.5)   |
| Plan type                     |                            |               |                        |               |                           |               |                        |               |
| PPO                           | 416 (48.0)                 | 44,819 (48.1) | 146 (45.9)             | 44,819 (48.1) | -                         | -             | -                      | -             |
| CDHP or HDHP                  | 216 (24.9)                 | 26,468 (28.4) | 83 (26.1)              | 26,468 (28.4) | -                         | -             | -                      | -             |
| HMO                           | 148 (17.1)                 | 13,083 (14.1) | 61 (19.2)              | 13,083 (14.1) | 3,088 (74.4)              | 67,075 (66.1) | 1,128 (71.6)           | 67,075 (66.1) |
| Comprehensive                 | -                          | -             | -                      | -             | 1,060 (25.6)              | 34,218 (33.7) | 448 (28.4)             | 34,218 (33.7) |
| Other <sup>C</sup>            | 87 (10.0)                  | 8,775 (9.4)   | 28 (8.8)               | 8,775 (9.4)   | 0 (-)                     | 143 (0.1)     | 0 (-)                  | 143 (0.1)     |

|                                | Privately insured database           |                                       |                                      |                                       | Publicly insured database              |                                        |                                        |                                        |
|--------------------------------|--------------------------------------|---------------------------------------|--------------------------------------|---------------------------------------|----------------------------------------|----------------------------------------|----------------------------------------|----------------------------------------|
|                                | Sensitivity analysis 1               |                                       | Sensitivity analysis 2               |                                       | Sensitivity analysis 1                 |                                        | Sensitivity analysis 2                 |                                        |
|                                | (N = 94,012)                         |                                       | (N = 93,463)                         |                                       | (N = 105,584)                          |                                        | (N = 103,012)                          |                                        |
|                                | Proactive<br>initiators<br>(N = 867) | Routine<br>initiators<br>(N = 93,145) | Proactive<br>initiators<br>(N = 318) | Routine<br>initiators<br>(N = 93,145) | Proactive<br>initiators<br>(N = 4,418) | Routine<br>initiators<br>(N = 101,436) | Proactive<br>initiators<br>(N = 1,576) | Routine<br>initiators<br>(N = 101,436) |
| Urbanicity                     |                                      |                                       |                                      |                                       |                                        |                                        |                                        |                                        |
| Rural                          | 77 (8.9)                             | 7,615 (8.2)                           | 31 (9.8)                             | 7,615 (8.2)                           | -                                      | -                                      | -                                      | -                                      |
| Urban                          | 790 (91.1)                           | 85,530 (91.8)                         | 287 (90.3)                           | 85,530 (91.8)                         | -                                      | -                                      | -                                      | -                                      |
| Geographic region              |                                      |                                       |                                      |                                       |                                        |                                        |                                        |                                        |
| Northeast                      | 139 (16.0)                           | 11,683 (12.5)                         | 50 (15.7)                            | 11,683 (12.5)                         | -                                      | -                                      | -                                      | -                                      |
| North Central                  | 207 (23.9)                           | 23,053 (24.8)                         | 90 (28.3)                            | 23,053 (24.8)                         | -                                      | -                                      | -                                      | -                                      |
| South                          | 329 (38.0)                           | 38,630 (41.5)                         | 117 (36.8)                           | 38,630 (41.5)                         | -                                      | -                                      | -                                      | -                                      |
| West                           | 190 (21.9)                           | 19,288 (20.7)                         | 60 (18.9)                            | 19,288 (20.7)                         | -                                      | -                                      | -                                      | -                                      |
| Unknown                        | 2 (0.2)                              | 491 (0.5)                             | 1 (0.3)                              | 491 (0.5)                             | -                                      | -                                      | -                                      | -                                      |
| Vaccine financing policy       |                                      |                                       |                                      |                                       |                                        |                                        |                                        |                                        |
| VFC only                       | 326 (37.6)                           | 32,440 (34.8)                         | 120 (37.7)                           | 32,440 (34.8)                         | -                                      | -                                      | -                                      | -                                      |
| VFC and underinsured           | 264 (30.4)                           | 26,559 (28.5)                         | 125 (39.3)                           | 26,559 (28.5)                         | -                                      | -                                      | -                                      | -                                      |
| VFC and underinsured<br>select | 16 (1.9)                             | 4,408 (4.7)                           | 5 (1.6)                              | 4,408 (4.7)                           | -                                      | -                                      | -                                      | -                                      |
| Universal                      | 13 (1.5)                             | 2,414 (2.6)                           | 4 (1.3)                              | 2,414 (2.6)                           | -                                      | -                                      | -                                      | -                                      |
| Universal select               | 35 (4.0)                             | 6,135 (6.6)                           | 10 (3.1)                             | 6,135 (6.6)                           | -                                      | -                                      | -                                      | -                                      |
| Other                          | 213 (24.6)                           | 21,189 (22.8)                         | 54 (17.0)                            | 21,189 (22.8)                         | -                                      | -                                      | -                                      | -                                      |

|                                              | Privately insured database           |                                       |                                      |                                       | Publicly insured database              |                                        |                                        |                                        |
|----------------------------------------------|--------------------------------------|---------------------------------------|--------------------------------------|---------------------------------------|----------------------------------------|----------------------------------------|----------------------------------------|----------------------------------------|
|                                              | Sensitivity analysis 1               |                                       | Sensitivity analysis 2               |                                       | Sensitivity analysis 1                 |                                        | Sensitivity analysis 2                 |                                        |
|                                              | (N = 94,012)                         |                                       | (N = 93,463)                         |                                       | (N = 105,584)                          |                                        | (N = 103,012)                          |                                        |
|                                              | Proactive<br>initiators<br>(N = 867) | Routine<br>initiators<br>(N = 93,145) | Proactive<br>initiators<br>(N = 318) | Routine<br>initiators<br>(N = 93,145) | Proactive<br>initiators<br>(N = 4,418) | Routine<br>initiators<br>(N = 101,436) | Proactive<br>initiators<br>(N = 1,576) | Routine<br>initiators<br>(N = 101,436) |
| Provider type <sup>D</sup>                   |                                      |                                       |                                      |                                       |                                        |                                        |                                        |                                        |
| Family medicine                              | 120 (13.8)                           | 9,241 (9.9)                           | 46 (14.5)                            | 9,241 (9.9)                           | 51 (1.2)                               | 4,397 (4.3)                            | 17 (1.1)                               | 4,397 (4.3)                            |
| Pediatrician                                 | 601 (69.3)                           | 69,279 (74.4)                         | 225 (70.8)                           | 69,279 (74.4)                         | 1,073 (25.9)                           | 37,628 (37.1)                          | 333 (21.1)                             | 37,628 (37.1)                          |
| Physician (unspecified or<br>rare specialty) | 45 (5.2)                             | 5,534 (5.9)                           | 13 (4.1)                             | 5,534 (5.9)                           | 653 (15.7)                             | 20,352 (20.1)                          | 303 (19.2)                             | 20,352 (20.1)                          |
| Internal medicine                            | 10 (1.2)                             | 1,610 (1.7)                           | 1 (0.3)                              | 1,610 (1.7)                           | 16 (0.4)                               | 457 (0.5)                              | 6 (0.4)                                | 457 (0.5)                              |
| Nurse practitioner                           | 23 (2.7)                             | 2,352 (2.5)                           | 10 (3.1)                             | 2,352 (2.5)                           | 111 (2.7)                              | 9,840 (9.7)                            | 39 (2.5)                               | 9,840 (9.7)                            |
| Other                                        | 68 (7.8)                             | 5,129 (5.5)                           | 23 (7.2)                             | 5,129 (5.5)                           | 2,244 (54.1)                           | 28,762 (28.4)                          | 878 (55.7)                             | 28,762 (28.4)                          |
| Immunocompromised<br>status                  |                                      |                                       |                                      |                                       |                                        |                                        |                                        |                                        |
| Yes                                          | 5 (0.6)                              | 311 (0.3)                             | 2 (0.6)                              | 311 (0.3)                             | 16 (0.4)                               | 308 (0.3)                              | 5 (0.3)                                | 308 (0.3)                              |
| No                                           | 862 (99.4)                           | 92,834 (99.7)                         | 316 (99.4)                           | 92,834 (99.7)                         | 4,132 (99.6)                           | 101,128 (99.7)                         | 1,571 (99.7)                           | 101,128 (99.7)                         |
| Well check visits                            |                                      |                                       |                                      |                                       |                                        |                                        |                                        |                                        |
| Yes                                          | 463 (53.4)                           | 47,650 (51.2)                         | 168 (52.8)                           | 47,650 (51.2)                         | 1,994 (48.1)                           | 44,572 (43.9)                          | 736 (46.7)                             | 44,572 (43.9)                          |
| No                                           | 404 (46.6)                           | 45,945 (48.8)                         | 150 (47.2)                           | 45,945 (48.8)                         | 2,154 (51.9)                           | 56,864 (56.1)                          | 840 (53.3)                             | 56,864 (56.1)                          |
| Prior vaccinations                           |                                      |                                       |                                      |                                       |                                        |                                        |                                        |                                        |
| Yes                                          | 392 (45.2)                           | 44,197 (47.5)                         | 141 (44.3)                           | 44,197 (47.5)                         | 1,612 (38.9)                           | 32,277 (31.8)                          | 639 (40.6)                             | 32,277 (31.8)                          |
| No                                           | 475 (54.8)                           | 48,948 (52.6)                         | 177 (55.7)                           | 48,948 (52.6)                         | 2,536 (61.1)                           | 69,159 (68.2)                          | 937 (59.5)                             | 69,159 (68.2)                          |
| Index year                                   |                                      |                                       |                                      |                                       |                                        |                                        |                                        |                                        |

|      | Privately insured database        |                                    |                                   |                                    | Publicly insured database           |                                     |                                     |                                     |
|------|-----------------------------------|------------------------------------|-----------------------------------|------------------------------------|-------------------------------------|-------------------------------------|-------------------------------------|-------------------------------------|
|      | Sensitivity analysis 1            |                                    | Sensitivity analysis 2            |                                    | Sensitivity analysis 1              |                                     | Sensitivity analysis 2              |                                     |
|      | (N = 94,012)                      |                                    | (N = 93,463)                      |                                    | (N = 105,584)                       |                                     | (N = 103,012)                       |                                     |
|      | Proactive initiators<br>(N = 867) | Routine initiators<br>(N = 93,145) | Proactive initiators<br>(N = 318) | Routine initiators<br>(N = 93,145) | Proactive initiators<br>(N = 4,418) | Routine initiators<br>(N = 101,436) | Proactive initiators<br>(N = 1,576) | Routine initiators<br>(N = 101,436) |
| 2016 | 381 (43.9)                        | 26,924 (28.9)                      | 315 (99.1)                        | 26,924 (28.9)                      | 2,029 (48.9)                        | 31,986 (31.5)                       | 1576 (100)                          | 31,986 (31.5)                       |
| 2017 | 479 (55.3)                        | 30,798 (33.1)                      | 3 (0.9)                           | 30,798 (33.1)                      | 2,119 (51.1)                        | 37,310 (36.8)                       | 0 (-)                               | 37,310 (36.8)                       |
| 2018 | 7 (0.8)                           | 34,801 (37.4)                      | 0 (-)                             | 34,801 (37.3)                      | 0 (-)                               | 32,140 (31.7)                       | 0 (-)                               | 32,140 (31.7)                       |
| 2019 | 0 (-)                             | 622 (0.7)                          | 0 (-)                             | 622 (0.7)                          | -                                   | -                                   | -                                   | -                                   |

CDHP, consumer directed health plan; HDHP, high-deductible health plan; HMO, health maintenance organization; PPO, preferred provider organization; VFC, Vaccines for Children.

<sup>A</sup> Values presented as *n* (%). Follow-up periods were defined as follows: base case, ≥13 months; sensitivity analysis 1, ≥25 months or until the year of 13th birthday, whichever occurred first; sensitivity analysis 2, ≥37 months or until the year of 13th birthday, whichever occurred first.

<sup>B</sup> Individuals with no recorded data for race / ethnicity were included in the "Other" category.

<sup>C</sup> Privately insured database: individuals with comprehensive, EPO, POS, POS with capitation, or any other health care plan were classified in "Others" category. Publicly insured database: individuals with PPO or any other health care plan were classified in the "Others" category.

<sup>D</sup> The category Physician (unspecified or rare medical specialty) in both databases includes Physician, Surgery, Neonatal-Perinatal Medicine, Obstetrics & Gynecology, Medical doctor, where Physician includes Multi-Specialty Physician Group and Physician Assistant and Surgery includes Surgeon (NEC), Colon & Rectal Surgery, Neurological Surgery, Orthopedic Surgery, Abdominal Surgery, Cardiovascular Surgery, Dermatologic Surgery, General Vascular Surgery, Head and Neck Surgery, Pediatric Surgery, Transplant Surgery, Traumatic Surgery, Cardiothoracic Surgery and Thoracic Surgery. Individuals with pharmacist or missing data for provider type were included in the "Other" category.

**Table S5.** Percentage of vaccination series completers among proactive and routine initiators in 3 sensitivity analyses <sup>A</sup>

| Initiator group | Privately insured database |                            |                            |                             | Publicly insured database |                             |                             |                              |
|-----------------|----------------------------|----------------------------|----------------------------|-----------------------------|---------------------------|-----------------------------|-----------------------------|------------------------------|
|                 | Base case                  | Sensitivity                | Sensitivity                | Sensitivity                 | Base case                 | Sensitivity                 | Sensitivity                 | Sensitivity                  |
|                 | (N = 100,117)              | analysis 1<br>(N = 94,012) | analysis 2<br>(N = 93,463) | analysis 3<br>(N = 100,117) | (N = 115, 863)            | analysis 1<br>(N = 105,584) | analysis 2<br>(N = 103,312) | analysis 3<br>(N = 115, 863) |
| Proactive       | 76.2                       | 84.2                       | 87.7                       | 76.3                        | 70.4                      | 78.0                        | 82.0                        | 70.6                         |
| Routine         | 48.1                       | 47.3                       | 47.3                       | 66.2                        | 40.0                      | 39.2                        | 39.2                        | 52.4                         |

<sup>A</sup> Proactive initiators received their first HPV vaccination at 9–10 years of age, and routine initiators at 11–12 years of age. Follow-up periods were defined as follows: base case,  $\geq 13$  months (see main Results section); sensitivity analysis 1,  $\geq 25$  months or until the year of 13th birthday, whichever occurred first; sensitivity analysis 2,  $\geq 37$  months or until the year of 13th birthday, whichever occurred first; sensitivity analysis 3,  $\geq 13$  months plus 30-day grace period.



**Table S6.** Demographic and clinical characteristics associated with HPV vaccination series completion by 13 years of age in sensitivity analyses with extended follow-up periods <sup>A</sup>.

| Characteristic                                      | Value                                     | Privately insured database |                        | Publicly insured database |                        |
|-----------------------------------------------------|-------------------------------------------|----------------------------|------------------------|---------------------------|------------------------|
|                                                     |                                           | Sensitivity analysis 1     | Sensitivity analysis 2 | Sensitivity analysis 1    | Sensitivity analysis 2 |
| Age group (Referent: Routine initiators)            | Proactive initiators                      | 5.49 (4.56, 6.60)          | 6.57 (4.68, 9.23)      | 5.21 (4.83, 5.62)         | 6.17 (5.40, 7.04)      |
| Sex (Referent: Male)                                | Female                                    | 1.13 (1.1, 1.16)           | 1.13 (1.1, 1.16)       | 1.07 (1.04, 1.10)         | 1.07 (1.04, 1.10)      |
| Race / ethnicity (Referent: Non-Hispanic White)     | Non-Hispanic Black                        | -                          | -                      | 0.79 (0.77, 0.82)         | 0.79 (0.77, 0.82)      |
|                                                     | Hispanic                                  | -                          | -                      | 1.09 (1.04, 1.13)         | 1.08 (1.03, 1.12)      |
|                                                     | Other                                     | -                          | -                      | 1.04 (1.00, 1.09)         | 1.04 (1.00, 1.09)      |
| Provider type (Referent: Pediatrician) <sup>B</sup> | Family medicine                           | 1.10 (1.05, 1.15)          | 1.10 (1.05, 1.15)      | 0.95 (0.89, 1.01)         | 0.95 (0.89, 1.01)      |
|                                                     | Physician (unspecified or rare specialty) | 1.14 (1.07, 1.20)          | 1.14 (1.08, 1.21)      | 1.08 (1.04, 1.12)         | 1.08 (1.03, 1.12)      |
|                                                     | Internal medicine                         | 1.08 (0.97, 1.19)          | 1.08 (0.98, 1.19)      | 0.87 (0.72, 1.06)         | 0.89 (0.73, 1.08)      |
|                                                     | Nurse practitioner                        | 0.96 (0.88, 1.04)          | 0.96 (0.88, 1.04)      | 1.04 (0.99, 1.09)         | 1.04 (0.99, 1.09)      |
|                                                     | Other                                     | 0.93 (0.88, 0.98)          | 0.93 (0.88, 0.99)      | 1.01 (0.98, 1.05)         | 1.02 (0.98, 1.05)      |
| Region (Referent: South)                            | Northeast                                 | 1.03 (0.99, 1.08)          | 1.03 (0.99, 1.08)      | -                         | -                      |
|                                                     | Northcentral                              | 1.08 (1.04, 1.12)          | 1.08 (1.04, 1.12)      | -                         | -                      |
|                                                     | West                                      | 1.13 (1.09, 1.18)          | 1.13 (1.09, 1.17)      | -                         | -                      |
|                                                     | Unknown                                   | 0.59 (0.49, 0.71)          | 0.58 (0.48, 0.71)      | -                         | -                      |
| Urbanicity (Referent: Urban)                        | Rural                                     | 1.08 (1.03, 1.13)          | 1.08 (1.03, 1.13)      | -                         | -                      |
| Plan type (Referent: HMO)                           | PPO                                       | 0.82 (0.78, 0.85)          | 0.82 (0.78, 0.85)      | -                         | -                      |
|                                                     | CDHP or HDHP                              | 0.82 (0.79, 0.86)          | 0.82 (0.79, 0.86)      | -                         | -                      |
|                                                     | Comprehensive                             | -                          | -                      | 0.96 (0.93, 0.99)         | 0.96 (0.93, 0.99)      |
|                                                     | Others                                    | 0.93 (0.88, 0.98)          | 0.93 (0.87, 0.98)      | 0.94 (0.67, 1.33)         | 0.95 (0.68, 1.33)      |
|                                                     | VFC and underinsured                      | 0.99 (0.96, 1.03)          | 0.99 (0.96, 1.03)      | -                         | -                      |

| Characteristic                                | Value                       | Privately insured database |                        | Publicly insured database |                        |
|-----------------------------------------------|-----------------------------|----------------------------|------------------------|---------------------------|------------------------|
|                                               |                             | Sensitivity analysis 1     | Sensitivity analysis 2 | Sensitivity analysis 1    | Sensitivity analysis 2 |
| Vaccine financing policy (Referent: VFC only) | VFC and underinsured select | 0.87 (0.81, 0.93)          | 0.87 (0.81, 0.93)      | -                         | -                      |
|                                               | Universal                   | 0.79 (0.73, 0.87)          | 0.79 (0.72, 0.86)      | -                         | -                      |
|                                               | Universal select            | 0.73 (0.69, 0.78)          | 0.73 (0.69, 0.78)      | -                         | -                      |
|                                               | Other                       | 1.09 (1.06, 1.14)          | 1.09 (1.06, 1.14)      | -                         | -                      |
| Immunocompromised status (Referent: No)       | Yes                         | 0.09 (0.06, 0.14)          | 0.09 (0.06, 0.14)      | 0.11 (0.07, 0.16)         | 0.12 (0.08, 0.18)      |
| Prior vaccinations (Referent: No)             | Yes                         | 1.38 (1.35, 1.42)          | 1.38 (1.35, 1.42)      | 1.45 (1.41, 1.50)         | 1.46 (1.42, 1.50)      |
| Well check visits (Referent: No)              | Yes                         | 1.34 (1.30, 1.38)          | 1.34 (1.30, 1.38)      | 1.39 (1.35, 1.43)         | 1.39 (1.35, 1.43)      |
| Index year (Referent: 2016)                   | 2017                        | 0.81 (0.79, 0.84)          | 0.81 (0.79, 0.84)      | 0.85 (0.83, 0.88)         | 0.86 (0.83, 0.88)      |
|                                               | 2018                        | 0.67 (0.65, 0.70)          | 0.68 (0.65, 0.70)      | 0.78 (0.75, 0.80)         | 0.78 (0.75, 0.81)      |
|                                               | 2019                        | 0.69 (0.58, 0.81)          | 0.69 (0.58, 0.81)      | -                         | -                      |

CDHP, consumer directed health plan; HDHP, high-deductible health plan; HMO, health maintenance organization; PPO, preferred provider organization; VFC, Vaccines for Children.

<sup>A</sup> Analysis performed via logistic regression. Results presented as odds ratio (95% confidence interval). Follow-up periods were defined as follows: base case,  $\geq 13$  months; sensitivity analysis 1,  $\geq 25$  months or until the year of 13th birthday, whichever occurred first; sensitivity analysis 2,  $\geq 37$  months or until the year of 13th birthday, whichever occurred first.

<sup>B</sup> The category Physician (unspecified or rare medical specialty) in both databases includes Physician, Surgery, Neonatal-Perinatal Medicine, Obstetrics & Gynecology, Medical doctor, where Physician includes Multi-Specialty Physician Group and Physician Assistant and Surgery includes Surgeon (NEC), Colon & Rectal Surgery, Neurological Surgery, Orthopedic Surgery, Abdominal Surgery, Cardiovascular Surgery, Dermatologic Surgery, General Vascular Surgery, Head and Neck Surgery, Pediatric Surgery, Transplant Surgery, Traumatic Surgery, Cardiothoracic Surgery and Thoracic Surgery. Individuals with pharmacist or missing data for provider type were included in the "Other" category.

**Table S7.** Demographic and clinical characteristics of the study population for a post-hoc sensitivity analysis allowing  $\leq 4$  years to complete an HPV vaccination series.

| Characteristic                       | Privately insured database        |                                    | Publicly insured database           |                                    |
|--------------------------------------|-----------------------------------|------------------------------------|-------------------------------------|------------------------------------|
|                                      | (N = 17,157)                      |                                    | (N = 20,698)                        |                                    |
|                                      | Proactive initiators<br>(N = 315) | Routine initiators<br>(N = 16,842) | Proactive initiators<br>(N = 1,563) | Routine initiators<br>(N = 19,135) |
| <b>Gender</b>                        |                                   |                                    |                                     |                                    |
| Female                               | 182 (57.78)                       | 8,705 (51.69)                      | 772 (49.39)                         | 9,728 (50.84)                      |
| Male                                 | 133 (42.22)                       | 8,137 (48.31)                      | 791 (50.61)                         | 9,407 (49.16)                      |
| <b>Race / ethnicity <sup>B</sup></b> |                                   |                                    |                                     |                                    |
| White                                | -                                 | -                                  | 512 (32.76)                         | 8,370 (43.74)                      |
| Black                                | -                                 | -                                  | 605 (38.71)                         | 6,716 (35.10)                      |
| Hispanic                             | -                                 | -                                  | 296 (18.94)                         | 2,368 (12.38)                      |
| Other                                | -                                 | -                                  | 150 (9.60)                          | 1,681 (8.78)                       |
| <b>Plan type</b>                     |                                   |                                    |                                     |                                    |
| PPO                                  | 146 (46.35)                       | 8,282 (49.17)                      | -                                   | -                                  |
| CDHP or HDHP                         | 80 (25.40)                        | 4,581 (27.20)                      | -                                   | -                                  |
| HMO                                  | 61 (19.37)                        | 2,630 (15.62)                      | 1,121 (71.72)                       | 12,183 (63.67)                     |
| Comprehensive                        | -                                 | -                                  | 442 (28.28)                         | 6,951 (36.33)                      |
| Other <sup>C</sup>                   | 28 (8.89)                         | 1,349 (8.01)                       | -                                   | 1 (0.01)                           |
| <b>Urbanicity</b>                    |                                   |                                    |                                     |                                    |
| Rural                                | 31 (9.84)                         | 1,380 (8.19)                       | -                                   | -                                  |
| Urban                                | 284 (90.16)                       | 15,462 (91.81)                     | -                                   | -                                  |
| <b>Geographic region</b>             |                                   |                                    |                                     |                                    |
| Northeast                            | 50 (15.87)                        | 2,410 (14.31)                      | -                                   | -                                  |

| Characteristic                               | Privately insured database        |                                    | Publicly insured database           |                                    |
|----------------------------------------------|-----------------------------------|------------------------------------|-------------------------------------|------------------------------------|
|                                              | (N = 17,157)                      |                                    | (N = 20,698)                        |                                    |
|                                              | Proactive initiators<br>(N = 315) | Routine initiators<br>(N = 16,842) | Proactive initiators<br>(N = 1,563) | Routine initiators<br>(N = 19,135) |
| North Central                                | 89 (28.25)                        | 4,312 (25.60)                      | -                                   | -                                  |
| South                                        | 116 (36.83)                       | 7,017 (41.66)                      | -                                   | -                                  |
| West                                         | 59 (18.73)                        | 3,078 (18.28)                      | -                                   | -                                  |
| Unknown                                      | 1 (0.32)                          | 25 (0.15)                          | -                                   | -                                  |
| Vaccine financing policy                     |                                   |                                    |                                     |                                    |
| VFC only                                     | 119 (37.78)                       | 5,376 (31.92)                      | -                                   | -                                  |
| VFC and underinsured                         | 123 (39.05)                       | 6,803 (40.39)                      | -                                   | -                                  |
| VFC and underinsured<br>select               | 5 (1.59)                          | 819 (4.86)                         | -                                   | -                                  |
| Universal                                    | 4 (1.27)                          | 307 (1.82)                         | -                                   | -                                  |
| Universal select                             | 10 (3.17)                         | 907 (5.39)                         | -                                   | -                                  |
| Other                                        | 54 (17.14)                        | 2,630 (15.62)                      | -                                   | -                                  |
| Provider type <sup>D</sup>                   |                                   |                                    |                                     |                                    |
| Family medicine                              | 46 (14.6)                         | 1,351 (8.0)                        | 17 (1.1)                            | 462 (2.4)                          |
| Pediatrician                                 | 222 (70.5)                        | 13,344 (79.2)                      | 327 (20.9)                          | 4,795 (25.1)                       |
| Physician (unspecified<br>or rare specialty) | 13 (4.1)                          | 783 (4.7)                          | 298 (19.1)                          | 6,161 (32.2)                       |
| Internal medicine                            | 1 (0.3)                           | 281 (1.7)                          | 6 (0.4)                             | 60 (0.3)                           |
| Nurse practitioner                           | 10 (3.2)                          | 353 (2.1)                          | 38 (2.4)                            | 1,878 (9.8)                        |
| Other                                        | 23 (7.3)                          | 730 (4.3)                          | 877 (56.1)                          | 5,779 (30.2)                       |

| Characteristic           | Privately insured database        |                                    | Publicly insured database           |                                    |
|--------------------------|-----------------------------------|------------------------------------|-------------------------------------|------------------------------------|
|                          | (N = 17,157)                      |                                    | (N = 20,698)                        |                                    |
|                          | Proactive initiators<br>(N = 315) | Routine initiators<br>(N = 16,842) | Proactive initiators<br>(N = 1,563) | Routine initiators<br>(N = 19,135) |
| Immunocompromised status |                                   |                                    |                                     |                                    |
| Yes                      | 2 (0.63)                          | 52 (0.31)                          | 5 (0.32)                            | 48 (0.25)                          |
| No                       | 313 (99.37)                       | 16,790 (99.69)                     | 1,558 (99.68)                       | 19,087 (99.75)                     |
| Well check visits        |                                   |                                    |                                     |                                    |
| Yes                      | 165 (52.38)                       | 8,469 (50.29)                      | 727 (46.51)                         | 8,513 (44.49)                      |
| No                       | 150 (47.62)                       | 8,373 (49.71)                      | 836 (53.49)                         | 10,622 (55.51)                     |
| Prior vaccinations       |                                   |                                    |                                     |                                    |
| Yes                      | 139 (44.13)                       | 8,008 (47.55)                      | 632 (40.44)                         | 6,625 (34.62)                      |
| No                       | 176 (55.87)                       | 8,834 (52.45)                      | 931 (59.56)                         | 12,510 (65.38)                     |
| Index year               |                                   |                                    |                                     |                                    |
| 2016                     | 312 (99.05)                       | 16,568 (98.37)                     | 1,563 (100.00)                      | 19,135 (100.00)                    |
| 2017                     | 3 (0.95)                          | 274 (1.63)                         | -                                   | -                                  |

CDHP, consumer directed health plan; HDHP, high-deductible health plan; HMO, health maintenance organization; PPO, preferred provider organization; VFC, Vaccines for Children

<sup>A</sup> Values presented as N (%).

<sup>B</sup> Individuals with no recorded data for race / ethnicity were included in the "Other" category.

<sup>C</sup> Privately insured database: individuals with comprehensive, EPO, POS, POS with capitation, or any other health care plan were classified in "Others" category. Publicly insured database: individuals with PPO or any other health care plan were classified in the "Others" category.

<sup>D</sup> The category Physician (unspecified or rare medical specialty) in both databases includes Physician, Surgery, Neonatal-Perinatal Medicine, Obstetrics & Gynecology, Medical doctor, where Physician includes Multi-Specialty Physician Group and Physician Assistant and Surgery includes Surgeon (NEC), Colon & Rectal Surgery, Neurological Surgery, Orthopedic Surgery, Abdominal Surgery, Cardiovascular Surgery, Dermatologic Surgery, General Vascular Surgery, Head and Neck Surgery, Pediatric Surgery, Transplant Surgery, Traumatic Surgery, Cardiothoracic Surgery and Thoracic Surgery. Individuals with pharmacist or missing data for provider type were included in the "Other" category.

**Table S8.** Percentage of proactive and routine vaccination series initiators who completed the series within 4 years <sup>A</sup>

| Initiator group | Privately insured database | Publicly insured database |
|-----------------|----------------------------|---------------------------|
|                 | (N = 17,157)               | (N = 20,698)              |
| Proactive       | 88.89                      | 82.98                     |
| Routine         | 88.01                      | 78.64                     |

<sup>A</sup> Proactive initiators received their first HPV vaccination at 9–10 years of age, and routine initiators at 11–12 years of age. Follow-up periods were defined as follows: proactive initiators, until year of 13<sup>th</sup> birthday; routine initiators, until year of 15<sup>th</sup> birthday.

**Table S9.** Demographic and clinical characteristics associated with HPV vaccination series completion within 4 years <sup>A</sup>

| Characteristic                                      | Value                                     | Privately insured database | Publicly insured database |
|-----------------------------------------------------|-------------------------------------------|----------------------------|---------------------------|
| Age group (Referent: Routine initiators)            | Proactive initiators                      | 1.19 (0.82, 1.71)          | 1.47 (1.28, 1.69)         |
| Sex (Referent: Male)                                | Female                                    | 1.07 (0.97, 1.17)          | 0.99 (0.93, 1.06)         |
| Race / ethnicity (Referent: White)                  | Black                                     | -                          | 0.88 (0.82, 0.95)         |
|                                                     | Hispanic                                  | -                          | 1.27 (1.12, 1.43)         |
|                                                     | Other                                     | -                          | 0.99 (0.87, 1.12)         |
| Provider type (Referent: Pediatrician) <sup>B</sup> | Family medicine                           | 0.57 (0.49, 0.67)          | 0.49 (0.40, 0.61)         |
|                                                     | Physician (unspecified or rare specialty) | 0.79 (0.63, 0.99)          | 0.86 (0.75, 0.98)         |
|                                                     | Internal medicine                         | 1.08 (0.73, 1.61)          | 0.67 (0.38, 1.19)         |
|                                                     | Nurse practitioner                        | 0.47 (0.36, 0.61)          | 1.04 (0.89, 1.21)         |
|                                                     | Other                                     | 0.49 (0.40, 0.59)          | 0.55 (0.49, 0.63)         |
| Region (Referent: South)                            | Northeast                                 | 1.06 (0.91, 1.24)          | -                         |
|                                                     | Northcentral                              | 1.67 (1.45, 1.93)          | -                         |
|                                                     | West                                      | 1.11 (0.97, 1.28)          | -                         |

| Characteristic                                | Value                       | Privately insured database | Publicly insured database |
|-----------------------------------------------|-----------------------------|----------------------------|---------------------------|
|                                               | Unknown                     | 0.51 (0.20, 1.28)          | -                         |
| Urbanicity (Referent: Urban)                  | Rural                       | 0.59 (0.51, 0.69)          | -                         |
| Plan type (Referent: HMO)                     | PPO                         | 0.8 (0.69, 0.93)           | -                         |
|                                               | CDHP or HDHP                | 0.91 (0.77, 1.07)          | -                         |
|                                               | Comprehensive               | -                          | 0.99 (0.88, 1.12)         |
|                                               | Others                      | 0.63 (0.51, 0.77)          | - <sup>c</sup>            |
|                                               |                             |                            |                           |
| Vaccine financing policy (Referent: VFC only) | VFC and underinsured        | 1.02 (0.90, 1.16)          | -                         |
|                                               | VFC and underinsured select | 0.97 (0.74, 1.28)          | -                         |
|                                               | Universal                   | 0.83 (0.58, 1.20)          | -                         |
|                                               | Universal select            | 0.7 (0.58, 0.86)           | -                         |
|                                               | Other                       | 0.96 (0.83, 1.11)          | -                         |
| Immunocompromised status (Referent: No)       | Yes                         | 0.07 (0.04, 0.12)          | 0.11 (0.06, 0.21)         |
| Prior vaccinations (Referent: No)             | Yes                         | 1.73 (1.55, 1.92)          | 1.29 (1.19, 1.39)         |
| Well check visits (Referent: No)              | Yes                         | 1.75 (1.57, 1.94)          | 1.35 (1.25, 1.45)         |
| Index year (Referent: 2016)                   | 2017                        | 0.99 (0.69, 1.44)          | -                         |

CDHP, consumer directed health plan; HDHP, high-deductible health plan; HMO, health maintenance organization; PPO, preferred provider organization; VFC, Vaccines for Children.

A Analysis performed via logistic regression. Results presented as odds ratio (95% confidence interval). Follow-up periods were defined as follows: proactive initiators, until year of 13th birthday; routine initiators, until year of 15th birthday.

B The category Physician (unspecified or rare medical specialty) in both databases includes Physician, Surgery, Neonatal-Perinatal Medicine, Obstetrics & Gynecology, Medical doctor, where Physician includes Multi-Specialty Physician Group and Physician Assistant and Surgery includes Surgeon (NEC), Colon & Rectal Surgery, Neurological Surgery, Orthopedic Surgery, Abdominal Surgery, Cardiovascular Surgery, Dermatologic Surgery, General Vascular Surgery, Head and Neck Surgery, Pediatric Surgery, Transplant Surgery, Traumatic Surgery, Cardiothoracic Surgery and Thoracic Surgery. Individuals with pharmacist or missing data for provider type were included in the "Other" category.

C Estimates were not stable and are therefore not reported.
