# Supplementary figures and images for: HPV vaccine initiation at 9 or 10 years of age and better series completion by age 13 among privately and publicly insured children in the US
Source: PubMed Central journal article supplement — Hum Vaccin Immunother. 2023 Jan 11;19(1):2161253. doi: 10.1080/21645515.2022.2161253 (PMC9980633; doi:10.1080/21645515.2022.2161253), 2023-01-11

**Figure S1.** Sample construction.

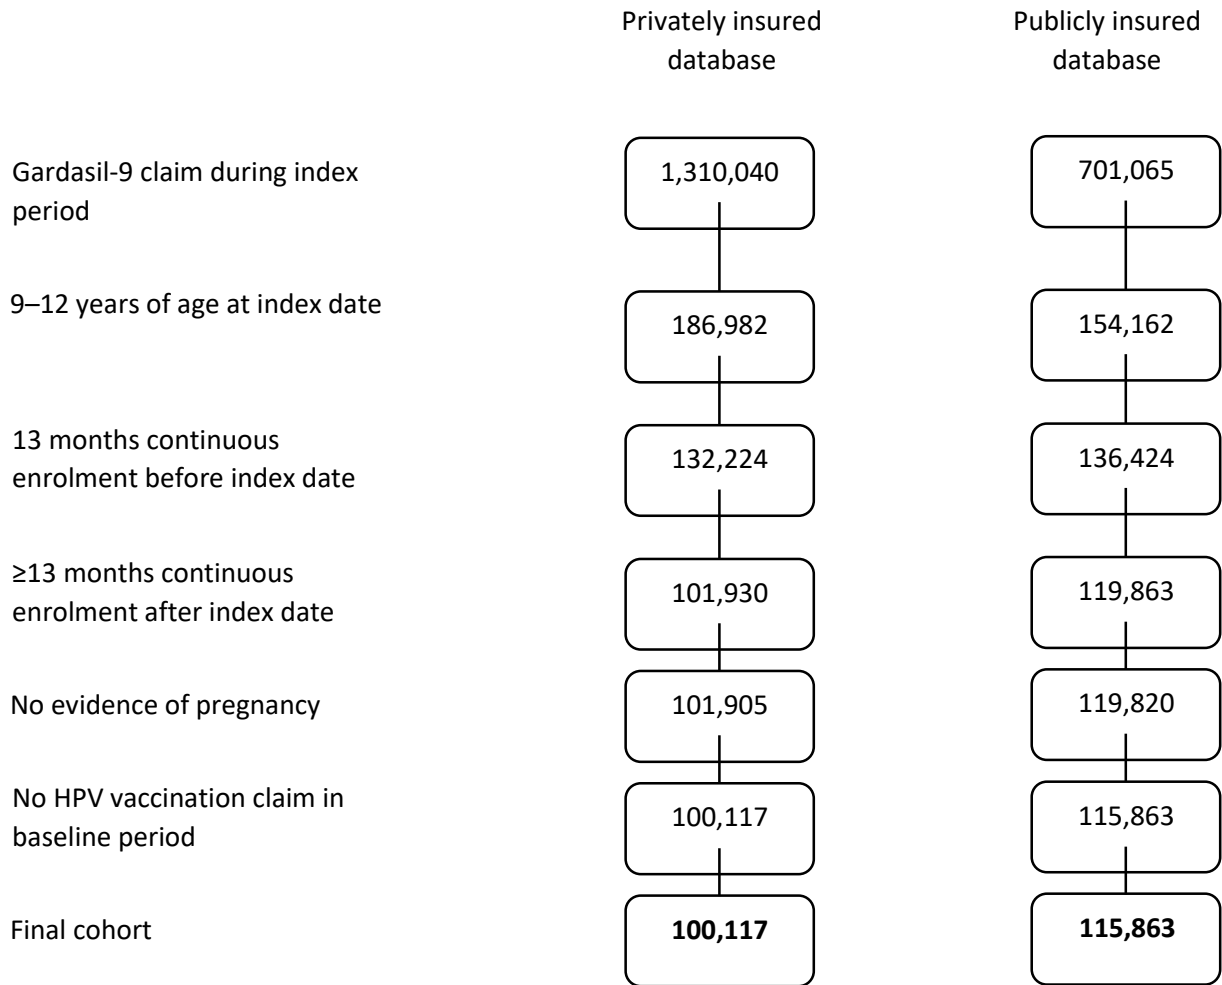

Supplement: KHVI_A_2161253_SM0153.pdf [file KHVI_A_2161253_SM0153.pdf]
